# Supplementary material for: Systematic Theoretical Study on the pH-Dependent Absorption and Fluorescence Spectra of Flavins
Source: MDPI journal article supplement (doi:10.3390/molecules28083315), 2023-04-08
Supplement: s1 [file s1]

# Supporting Information

## The pH-dependent Absorption and Fluorescence Spectra of Flavins

Jinyu Wang<sup>1</sup> and Ya-Jun Liu<sup>1,2,\*</sup>

1. Key Laboratory of Theoretical and Computational Photochemistry, Ministry of Education, College of Chemistry, Beijing Normal University, Beijing 100875, China.

2. Center for Advanced Materials Research, Beijing Normal University, Zhuhai 519087, China.

\* Correspondence: yajun.liu@bnu.edu.cn

# Contents

|                                                                                                                                                                                                                                                        |          |
|--------------------------------------------------------------------------------------------------------------------------------------------------------------------------------------------------------------------------------------------------------|----------|
| <b>1. Additional Table.....</b>                                                                                                                                                                                                                        | <b>2</b> |
| <b>Table S1</b> The pKa values under different functional, basis set and solvation models.....                                                                                                                                                         | <b>2</b> |
| <b>Table S2</b> The TD state order, transition, absorption maximum ( $\lambda_{max}$ ) and the oscillator strength ( $f$ ) of absorption spectra of flavins. States with $\lambda_{max}$ greater than 300 nm and $f$ greater than 0.01 are listed..... | <b>2</b> |
| <b>Table S3</b> FWHM of absorption and fluorescence spectra of ten forms of flavins. ....                                                                                                                                                              | <b>3</b> |
| <b>Table S4</b> The relative concentrations of each form of flavins in S <sub>0</sub> state at different pH values. ....                                                                                                                               | <b>5</b> |
| <b>Table S5</b> The relative concentrations of each form of flavins in S <sub>1</sub> state at different pH values. ....                                                                                                                               | <b>7</b> |
| <b>2. Cartesian coordinates (in Å).....</b>                                                                                                                                                                                                            | <b>9</b> |

# 1. Additional Table

**Table S1** The pKa values under different functional, basis set and solvation models.

| functional      | solvent model | basis set |           |            |
|-----------------|---------------|-----------|-----------|------------|
|                 |               | 6-31+G**  | 6-311+G** | 6-311++G** |
| CAM-B3LYP       | CPCM          | 8.5       | 8.7       | 8.7        |
|                 | SMD           | 8.2       | 8.3       | 8.3        |
| M06-2X          | CPCM          | 7.1       | 7.1       | 7.1        |
|                 | SMD           | 6.6       | 6.5       | 6.5        |
| $\omega$ B97X-D | CPCM          | 10.7      | 10.8      | 10.8       |
|                 | SMD           | 10.2      | 10.2      | 10.2       |

**Table S2** The TD state order, transition, absorption maximum ( $\lambda_{max}$ ) and the oscillator strength ( $f$ ) of absorption spectra of flavins. States with  $\lambda_{max}$  greater than 300 nm and  $f$  greater than 0.01 are listed.

| State                                        | TD state order | Transition                              | ( $\lambda_{max}/nm$ ) | $f$  |
|----------------------------------------------|----------------|-----------------------------------------|------------------------|------|
| FLH <sup>+</sup> <sub>ox-N1</sub>            | 1              | $\pi_2 \rightarrow \pi_3$               | 410.0                  | 0.03 |
|                                              | 2              | $\pi_1 \rightarrow \pi_3$               | 366.0                  | 0.52 |
| FL <sub>ox</sub>                             | 1              | $\pi_2 \rightarrow \pi_3$               | 427.5                  | 0.22 |
|                                              | 2              | $\pi_1 \rightarrow \pi_3$               | 358.7                  | 0.31 |
| FL <sub>ox</sub> <sup>-</sup>                | 2              | $\pi_2 \rightarrow \pi_3$               | 424.0                  | 0.25 |
|                                              | 4              | $\pi_1 \rightarrow \pi_3$               | 354.2                  | 0.21 |
| H <sub>2</sub> FL <sup>+</sup> <sub>sq</sub> | 5              | $\pi_0 \rightarrow \pi_3$               | 338.1                  | 0.15 |
|                                              | 1              | $\pi_2^\beta \rightarrow \pi_3^\beta$   | 523.3                  | 0.02 |
|                                              | 2              | $\pi_3^\alpha \rightarrow \pi_4^\alpha$ | 492.0                  | 0.02 |
|                                              | 3              | $\pi_1^\beta \rightarrow \pi_3^\beta$   | 465.2                  | 0.22 |
|                                              | 5              | $\pi_3^\alpha \rightarrow \pi_5^\alpha$ | 342.5                  | 0.16 |
|                                              | 6              | $\pi_3^\alpha \rightarrow \pi_6^\alpha$ | 335.7                  | 0.05 |
|                                              | 7              | $\pi_2^\beta \rightarrow \pi_4^\beta$   | 315.3                  | 0.02 |
|                                              | 8              | $\pi_0^\beta \rightarrow \pi_3^\beta$   | 307.9                  | 0.02 |

|                                                |    |                                          |       |      |
|------------------------------------------------|----|------------------------------------------|-------|------|
| HFL <sub>sq</sub> <sup>•</sup>                 | 1  | $\pi_2^\beta \rightarrow \pi_3^\beta$    | 568.6 | 0.11 |
|                                                | 2  | $\pi_1^\beta \rightarrow \pi_3^\beta$    | 460.3 | 0.06 |
|                                                | 3  | $\pi_3^\alpha \rightarrow \pi_4^\alpha$  | 449.2 | 0.06 |
|                                                | 5  | $\pi_3^\alpha \rightarrow \pi_5^\alpha$  | 355.5 | 0.08 |
|                                                | 6  | $\pi_3^\alpha \rightarrow \pi_6^\alpha$  | 340.2 | 0.08 |
|                                                | 7  | $\pi_0^\beta \rightarrow \pi_3^\beta$    | 332.1 | 0.06 |
|                                                | 9  | $\pi_{-1}^\beta \rightarrow \pi_3^\beta$ | 321.8 | 0.03 |
|                                                | 10 | $\pi_2^\alpha \rightarrow \pi_6^\alpha$  | 306.0 | 0.06 |
|                                                | 2  | $\pi_2^\beta \rightarrow \pi_3^\beta$    | 450.8 | 0.04 |
|                                                | 3  | $\pi_3^\alpha \rightarrow \pi_5^\alpha$  | 431.4 | 0.03 |
| FL <sub>sq</sub> <sup>•-</sup>                 | 4  | $\pi_1^\beta \rightarrow \pi_3^\beta$    | 385.6 | 0.12 |
|                                                | 7  | $\pi_3^\alpha \rightarrow \pi_6^\alpha$  | 363.1 | 0.37 |
|                                                | 1  | $\pi_3 \rightarrow \pi_4$                | 295.6 | 0.31 |
| H <sub>2</sub> FLH <sub>red</sub> <sup>+</sup> | 1  | $\pi_3 \rightarrow \pi_4$                | 392.4 | 0.06 |
| H <sub>2</sub> FL <sub>red</sub>               | 2  | $\pi_3 \rightarrow \pi_5$                | 312.0 | 0.11 |
|                                                | 3  | $\pi_3 \rightarrow \pi_6$                | 300.9 | 0.07 |
|                                                | 1  | $\pi_3 \rightarrow \pi_4$                | 370.8 | 0.03 |
| HFL <sub>red</sub> <sup>-</sup>                | 2  | $\pi_3 \rightarrow \pi_5$                | 330.4 | 0.08 |
|                                                | 3  | $\pi_3 \rightarrow \pi_6$                | 320.3 | 0.02 |

**Table S3** FWHM of absorption and fluorescence spectra of ten forms of flavins.

| Forms                                         | FWHM               |                      |
|-----------------------------------------------|--------------------|----------------------|
|                                               | absorption spectra | fluorescence spectra |
| FLH <sub>ox</sub> <sup>+</sup> _N1            | 0.5 eV             | -                    |
| FLH <sub>ox</sub> <sup>+</sup> _N5            | -                  | 0.5 eV               |
| FL <sub>ox</sub>                              | 0.4 eV             | 0.5 eV               |
| FL <sub>ox</sub> <sup>-</sup>                 | 0.4 eV             | 0.5 eV               |
| H <sub>2</sub> FL <sub>sq</sub> <sup>•+</sup> | 0.5 eV             | 0.5 eV               |
| HFL <sub>sq</sub> <sup>•</sup>                | 0.5 eV             | 0.5 eV               |

|                                       |         |        |
|---------------------------------------|---------|--------|
| $\text{FL}_{\text{sq}}^-$             | 0.35 eV | 0.5 eV |
| $\text{H}_2\text{FLH}_{\text{red}}^+$ | 0.5 eV  | 0.5 eV |
| $\text{H}_2\text{FL}_{\text{red}}$    | 0.7 eV  | 0.5 eV |
| $\text{HFL}_{\text{red}}^-$           | 0.5 eV  | 0.5 eV |

---

**Table S4** The relative concentrations of each form of flavins in S<sub>0</sub> state at different pH values.

| Redox state  | form                                           | pH                     |                       |                       |                       |                       |                        |                        |
|--------------|------------------------------------------------|------------------------|-----------------------|-----------------------|-----------------------|-----------------------|------------------------|------------------------|
|              |                                                | 1                      | 2                     | 3                     | 4                     | 5                     | 6                      | 7                      |
| quinone      | FLH <sub>ox-</sub> <sup>+</sup> N1             | $1.58 \times 10^{-4}$  | $1.58 \times 10^{-5}$ | $1.58 \times 10^{-6}$ | $1.58 \times 10^{-7}$ | $1.58 \times 10^{-8}$ | $1.58 \times 10^{-9}$  | $1.58 \times 10^{-10}$ |
|              | FL <sub>ox</sub>                               | $1.00 \times 10^0$     | $1.00 \times 10^0$    | $1.00 \times 10^0$    | $1.00 \times 10^0$    | $1.00 \times 10^0$    | $1.00 \times 10^0$     | $1.00 \times 10^0$     |
|              | FL <sub>ox</sub> <sup>-</sup>                  | $1.58 \times 10^{-10}$ | $1.58 \times 10^{-9}$ | $1.58 \times 10^{-8}$ | $1.58 \times 10^{-7}$ | $1.58 \times 10^{-6}$ | $1.58 \times 10^{-4}$  | $1.58 \times 10^{-3}$  |
| semiquinone  | H <sub>2</sub> FL <sub>sq</sub> <sup>+</sup>   | $1.12 \times 10^{-1}$  | $1.24 \times 10^{-2}$ | $1.26 \times 10^{-3}$ | $1.26 \times 10^{-4}$ | $1.26 \times 10^{-5}$ | $1.26 \times 10^{-6}$  | $1.23 \times 10^{-7}$  |
|              | HFL <sub>sq</sub>                              | $8.88 \times 10^{-1}$  | $9.88 \times 10^{-1}$ | $9.99 \times 10^{-1}$ | $1.00 \times 10^0$    | $1.00 \times 10^0$    | $9.97 \times 10^{-1}$  | $9.75 \times 10^{-1}$  |
|              | FL <sub>sq</sub> <sup>-</sup>                  | $2.23 \times 10^{-8}$  | $2.48 \times 10^{-7}$ | $2.51 \times 10^{-6}$ | $2.51 \times 10^{-5}$ | $2.51 \times 10^{-4}$ | $2.51 \times 10^{-3}$  | $2.45 \times 10^{-2}$  |
| hydroquinone | H <sub>2</sub> FLH <sub>red</sub> <sup>+</sup> | $2.51 \times 10^{-5}$  | $2.51 \times 10^{-6}$ | $2.51 \times 10^{-7}$ | $2.51 \times 10^{-8}$ | $2.45 \times 10^{-9}$ | $2.01 \times 10^{-10}$ | $7.15 \times 10^{-12}$ |
|              | H <sub>2</sub> FL <sub>red</sub>               | $1.00 \times 10^0$     | $1.00 \times 10^0$    | $1.00 \times 10^0$    | $9.97 \times 10^{-1}$ | $9.75 \times 10^{-1}$ | $7.99 \times 10^{-1}$  | $2.85 \times 10^{-1}$  |
|              | HFL <sub>red</sub> <sup>-</sup>                | $2.51 \times 10^{-6}$  | $2.51 \times 10^{-5}$ | $2.51 \times 10^{-4}$ | $2.51 \times 10^{-3}$ | $2.45 \times 10^{-2}$ | $2.01 \times 10^{-1}$  | $7.15 \times 10^{-1}$  |
| redox state  | form                                           | pH                     |                       |                       |                       |                       |                        |                        |

|              |                                                | 8                      | 9                      | 10                     | 11                     | 12                     | 13                     | 14                     |
|--------------|------------------------------------------------|------------------------|------------------------|------------------------|------------------------|------------------------|------------------------|------------------------|
| quinone      | FLH <sub>ox-</sub> <sup>+</sup> N1             | $1.58 \times 10^{-11}$ | $1.56 \times 10^{-12}$ | $1.37 \times 10^{-13}$ | $6.13 \times 10^{-15}$ | $9.41 \times 10^{-17}$ | $9.94 \times 10^{-19}$ | $9.99 \times 10^{-21}$ |
|              | FL <sub>ox</sub>                               | $9.98 \times 10^{-1}$  | $9.84 \times 10^{-1}$  | $8.63 \times 10^{-1}$  | $3.87 \times 10^{-1}$  | $5.94 \times 10^{-2}$  | $6.27 \times 10^{-3}$  | $6.31 \times 10^{-4}$  |
|              | FL <sub>ox</sub> <sup>-</sup>                  | $1.58 \times 10^{-3}$  | $1.56 \times 10^{-2}$  | $1.37 \times 10^{-1}$  | $6.13 \times 10^{-1}$  | $9.41 \times 10^{-1}$  | $9.94 \times 10^{-1}$  | $9.99 \times 10^0$     |
| semiquinone  | H <sub>2</sub> FL <sub>sq</sub> <sup>+</sup>   | $1.01 \times 10^{-8}$  | $3.58 \times 10^{-10}$ | $4.82 \times 10^{-12}$ | $4.99 \times 10^{-14}$ | $5.01 \times 10^{-16}$ | $5.01 \times 10^{-18}$ | $5.01 \times 10^{-20}$ |
|              | HFL <sub>sq</sub>                              | $7.99 \times 10^{-1}$  | $2.85 \times 10^{-1}$  | $3.83 \times 10^{-2}$  | $3.97 \times 10^{-3}$  | $3.98 \times 10^{-4}$  | $3.98 \times 10^{-5}$  | $3.98 \times 10^{-6}$  |
|              | FL <sub>sq</sub> <sup>-</sup>                  | $2.01 \times 10^{-1}$  | $7.15 \times 10^{-1}$  | $9.62 \times 10^{-1}$  | $9.96 \times 10^{-1}$  | $1.00 \times 10^0$     | $1.00 \times 10^0$     | $1.00 \times 10^0$     |
| hydroquinone | H <sub>2</sub> FLH <sub>red</sub> <sup>+</sup> | $9.62 \times 10^{-14}$ | $9.96 \times 10^{-16}$ | $1.00 \times 10^{-17}$ | $1.00 \times 10^{-19}$ | $1.00 \times 10^{-21}$ | $1.00 \times 10^{-23}$ | $1.00 \times 10^{-25}$ |
|              | H <sub>2</sub> FL <sub>red</sub>               | $3.83 \times 10^{-2}$  | $3.97 \times 10^{-3}$  | $3.98 \times 10^{-4}$  | $3.98 \times 10^{-5}$  | $3.98 \times 10^{-6}$  | $3.98 \times 10^{-7}$  | $3.98 \times 10^{-8}$  |
|              | HFL <sub>red</sub> <sup>-</sup>                | $9.62 \times 10^{-1}$  | $9.96 \times 10^{-1}$  | $1.00 \times 10^0$     |

**Table S5** The relative concentrations of each form of flavins in S<sub>1</sub> state at different pH values.

| redox state  | form                                           | pH                     |                        |                        |                        |                        |                        |                        |
|--------------|------------------------------------------------|------------------------|------------------------|------------------------|------------------------|------------------------|------------------------|------------------------|
|              |                                                | 1                      | 2                      | 3                      | 4                      | 5                      | 6                      | 7                      |
| quinone      | FLH <sup>+</sup> <sub>ox-N5</sub>              | $1.37 \times 10^{-1}$  | $1.56 \times 10^{-2}$  | $1.58 \times 10^{-3}$  | $1.58 \times 10^{-4}$  | $1.58 \times 10^{-5}$  | $1.58 \times 10^{-6}$  | $1.58 \times 10^{-7}$  |
|              | FL <sub>ox</sub>                               | $8.63 \times 10^{-1}$  | $9.84 \times 10^0$     | $1.00 \times 10^0$     |
|              | FL <sub>ox</sub> <sup>-</sup>                  | $2.73 \times 10^{-10}$ | $3.11 \times 10^{-9}$  | $3.16 \times 10^{-8}$  | $3.16 \times 10^{-7}$  | $3.16 \times 10^{-6}$  | $3.16 \times 10^{-5}$  | $3.16 \times 10^{-4}$  |
| semiquinone  | H <sub>2</sub> FL <sup>+</sup> <sub>sq</sub>   | $7.94 \times 10^{-5}$  | $7.94 \times 10^{-6}$  | $7.94 \times 10^{-7}$  | $7.94 \times 10^{-8}$  | $7.94 \times 10^{-9}$  | $7.94 \times 10^{-10}$ | $7.89 \times 10^{-11}$ |
|              | HFL <sub>sq</sub>                              | $1.00 \times 10^0$     | $9.99 \times 10^{-1}$  | $9.94 \times 10^{-1}$  |
|              | FL <sub>sq</sub> <sup>-</sup>                  | $6.31 \times 10^{-9}$  | $6.31 \times 10^{-8}$  | $6.31 \times 10^{-7}$  | $6.31 \times 10^{-6}$  | $6.31 \times 10^{-5}$  | $6.31 \times 10^{-4}$  | $6.27 \times 10^{-3}$  |
| hydroquinone | H <sub>2</sub> FLH <sup>+</sup> <sub>red</sub> | $7.94 \times 10^{-23}$ | $7.94 \times 10^{-24}$ | $7.94 \times 10^{-25}$ | $7.94 \times 10^{-26}$ | $7.94 \times 10^{-27}$ | $7.94 \times 10^{-28}$ | $7.93 \times 10^{-29}$ |
|              | H <sub>2</sub> FL <sub>red</sub>               | $1.00 \times 10^0$     | $9.98 \times 10^{-1}$  |
|              | HFL <sub>red</sub> <sup>-</sup>                | $2.00 \times 10^{-9}$  | $2.00 \times 10^{-8}$  | $2.00 \times 10^{-7}$  | $2.00 \times 10^{-6}$  | $2.00 \times 10^{-5}$  | $1.99 \times 10^{-4}$  | $1.99 \times 10^{-3}$  |
| redox state  | form                                           | pH                     |                        |                        |                        |                        |                        |                        |



|              |                                                | 8                      | 9                      | 10                     | 11                     | 12                     | 13                     | 14                     |
|--------------|------------------------------------------------|------------------------|------------------------|------------------------|------------------------|------------------------|------------------------|------------------------|
| quinone      | FLH <sub>ox-</sub> <sup>+</sup> N5             | $1.58 \times 10^{-8}$  | $1.54 \times 10^{-9}$  | $1.20 \times 10^{-10}$ | $3.81 \times 10^{-12}$ | $4.86 \times 10^{-14}$ | $5.00 \times 10^{-16}$ | $5.01 \times 10^{-17}$ |
|              | FL <sub>ox</sub>                               | $9.97 \times 10^{-1}$  | $9.69 \times 10^{-1}$  | $7.60 \times 10^{-1}$  | $2.40 \times 10^{-1}$  | $3.07 \times 10^{-2}$  | $3.15 \times 10^{-3}$  | $3.16 \times 10^{-4}$  |
|              | FL <sub>ox</sub> <sup>-</sup>                  | $3.15 \times 10^{-3}$  | $3.07 \times 10^{-2}$  | $2.40 \times 10^{-1}$  | $7.60 \times 10^{-1}$  | $9.69 \times 10^{-1}$  | $9.97 \times 10^{-1}$  | $1.00 \times 10^0$     |
| semiquinone  | H <sub>2</sub> FL <sub>sq</sub> <sup>+</sup>   | $7.47 \times 10^{-12}$ | $4.87 \times 10^{-13}$ | $1.09 \times 10^{-14}$ | $1.24 \times 10^{-16}$ | $1.26 \times 10^{-18}$ | $1.26 \times 10^{-20}$ | $1.26 \times 10^{-22}$ |
|              | HFL <sub>sq</sub>                              | $9.41 \times 10^{-1}$  | $6.13 \times 10^{-1}$  | $1.37 \times 10^{-1}$  | $1.56 \times 10^{-2}$  | $1.58 \times 10^{-3}$  | $1.58 \times 10^{-4}$  | $1.58 \times 10^{-5}$  |
|              | FL <sub>sq</sub> <sup>-</sup>                  | $5.94 \times 10^{-2}$  | $3.87 \times 10^{-1}$  | $8.63 \times 10^{-1}$  | $9.84 \times 10^{-1}$  | $9.98 \times 10^{-1}$  | $1.00 \times 10^0$     | $1.00 \times 10^0$     |
| hydroquinone | H <sub>2</sub> FLH <sub>red</sub> <sup>+</sup> | $7.79 \times 10^{-30}$ | $6.62 \times 10^{-31}$ | $2.65 \times 10^{-32}$ | $3.79 \times 10^{-34}$ | $3.96 \times 10^{-36}$ | $3.98 \times 10^{-38}$ | $3.98 \times 10^{-40}$ |
|              | H <sub>2</sub> FL <sub>red</sub>               | $9.80 \times 10^{-1}$  | $8.34 \times 10^{-1}$  | $3.34 \times 10^{-1}$  | $4.77 \times 10^{-2}$  | $4.99 \times 10^{-3}$  | $5.01 \times 10^{-4}$  | $5.01 \times 10^{-5}$  |
|              | HFL <sub>red</sub> <sup>-</sup>                | $1.96 \times 10^{-2}$  | $1.66 \times 10^{-1}$  | $6.66 \times 10^{-1}$  | $9.52 \times 10^{-1}$  | $9.95 \times 10^{-1}$  | $9.99 \times 10^{-1}$  | $1.00 \times 10^0$     |

## 2. Cartesian coordinates (in Å)

Table S6. The Cartesian coordinates was optimized equilibrium structures reported in this paper.

| gas | $\text{FLH}_{\text{ox}}^+ \text{N1-S}_0$ |           |           | water | $\text{FLH}_{\text{ox}}^+ \text{N1-S}_0$ |           |           |
|-----|------------------------------------------|-----------|-----------|-------|------------------------------------------|-----------|-----------|
| C   | 3.410774                                 | 0.850475  | 0.008566  | C     | 3.402238                                 | 0.850133  | 0.011315  |
| C   | 2.199876                                 | 1.501585  | -0.028241 | C     | 2.19886                                  | 1.508169  | -0.041429 |
| C   | 0.980303                                 | 0.787275  | -0.040911 | C     | 0.974758                                 | 0.7985    | -0.062072 |
| C   | 1.002649                                 | -0.632985 | -0.032135 | C     | 0.991648                                 | -0.622911 | -0.053659 |
| C   | 2.232053                                 | -1.299574 | 0.025238  | C     | 2.218675                                 | -1.296311 | 0.022555  |
| C   | 3.419783                                 | -0.579651 | 0.047509  | C     | 3.404349                                 | -0.581981 | 0.060921  |
| C   | -1.365253                                | -0.594168 | -0.013326 | C     | -1.361746                                | -0.590772 | -0.038869 |
| C   | -1.304296                                | 0.835395  | -0.024697 | C     | -1.304164                                | 0.833455  | -0.045929 |
| C   | -2.581594                                | 1.625559  | -0.017412 | C     | -2.575481                                | 1.604309  | -0.014428 |
| C   | -3.820393                                | -0.531375 | 0.07624   | C     | -3.780781                                | -0.540754 | 0.094919  |
| H   | 2.133437                                 | 2.585253  | -0.043398 | H     | 2.150176                                 | 2.592714  | -0.060951 |
| H   | 2.287839                                 | -2.379455 | 0.081922  | H     | 2.263355                                 | -2.376106 | 0.079342  |
| C   | 4.727969                                 | -1.310484 | 0.11812   | C     | 4.708108                                 | -1.313305 | 0.160489  |
| H   | 5.350234                                 | -1.069221 | -0.749878 | H     | 5.345105                                 | -1.07651  | -0.698607 |
| H   | 5.291353                                 | -1.009593 | 1.007271  | H     | 5.253716                                 | -1.002272 | 1.057801  |
| H   | 4.585502                                 | -2.391194 | 0.149654  | H     | 4.553119                                 | -2.392446 | 0.197435  |
| C   | 4.702319                                 | 1.618459  | 0.021243  | C     | 4.698735                                 | 1.605862  | 0.029778  |
| H   | 5.283053                                 | 1.397227  | 0.922147  | H     | 5.274204                                 | 1.372984  | 0.931548  |
| H   | 5.323879                                 | 1.355472  | -0.840339 | H     | 5.319413                                 | 1.331988  | -0.829797 |
| H   | 4.516074                                 | 2.692457  | -0.008533 | H     | 4.517196                                 | 2.68165   | 0.000078  |
| C   | -0.273367                                | -2.763462 | -0.195929 | C     | -0.26794                                 | -2.760435 | -0.213168 |
| H   | 0.617891                                 | -3.10147  | -0.716295 | H     | 0.627679                                 | -3.100719 | -0.72283  |
| H   | -0.331023                                | -3.225698 | 0.792781  | H     | -0.337342                                | -3.194616 | 0.785751  |
| H   | -1.128503                                | -3.046297 | -0.809446 | H     | -1.11924                                 | -3.04753  | -0.827165 |
| N   | -0.225335                                | -1.296151 | -0.076071 | N     | -0.225213                                | -1.288248 | -0.110087 |
| N   | -0.177942                                | 1.484896  | -0.05259  | N     | -0.181037                                | 1.495543  | -0.074701 |
| N   | -2.569356                                | -1.205765 | 0.042189  | N     | -2.565456                                | -1.211299 | 0.034516  |
| H   | -2.672795                                | -2.20772  | 0.152869  | H     | -2.647249                                | -2.222292 | 0.118472  |
| N   | -3.735371                                | 0.838866  | 0.015061  | N     | -3.715059                                | 0.832082  | 0.046319  |
| H   | -4.623334                                | 1.334367  | 0.029157  | H     | -4.609784                                | 1.319143  | 0.080367  |
| O   | -4.836269                                | -1.163836 | 0.150265  | O     | -4.828797                                | -1.149172 | 0.182508  |
| O   | -2.621544                                | 2.822668  | -0.041967 | O     | -2.62452                                 | 2.818386  | -0.038298 |

| gas | $\text{FLH}_{\text{ox}}^+ \text{N5-S}_0$ |           |           | water | $\text{FLH}_{\text{ox}}^+ \text{N5-S}_0$ |           |           |
|-----|------------------------------------------|-----------|-----------|-------|------------------------------------------|-----------|-----------|
| C   | -3.385093                                | -0.846586 | -0.000028 | C     | -3.375519                                | -0.848959 | 0.006957  |
| C   | -2.173858                                | -1.499623 | -0.000033 | C     | -2.173592                                | -1.510194 | -0.023749 |
| C   | -0.97433                                 | -0.766924 | 0.000009  | C     | -0.972254                                | -0.774842 | -0.035    |

|   |           |           |           |   |           |           |           |
|---|-----------|-----------|-----------|---|-----------|-----------|-----------|
| C | -0.962077 | 0.650191  | 0.000027  | C | -0.960972 | 0.644081  | -0.032219 |
| C | -2.204614 | 1.302963  | 0.000055  | C | -2.198029 | 1.307081  | 0.010029  |
| C | -3.392133 | 0.585854  | 0.000032  | C | -3.379686 | 0.5883    | 0.037671  |
| C | 1.454618  | 0.679696  | -0.000015 | C | 1.438675  | 0.661557  | -0.018539 |
| C | 1.379715  | -0.763273 | 0.000022  | C | 1.37211   | -0.771374 | -0.026609 |
| C | 2.626961  | -1.583796 | 0.000056  | C | 2.62046   | -1.564901 | -0.00692  |
| C | 3.780412  | 0.623232  | -0.000081 | C | 3.7456    | 0.624597  | 0.056637  |
| H | -2.129843 | -2.585851 | -0.000085 | H | -2.117804 | -2.595341 | -0.036321 |
| H | -2.247221 | 2.38485   | 0.000095  | H | -2.239447 | 2.388398  | 0.032853  |
| C | -4.701163 | 1.317913  | -0.000019 | C | -4.686445 | 1.315738  | 0.102723  |
| H | -5.29416  | 1.049128  | -0.880257 | H | -5.305978 | 1.06724   | -0.765693 |
| H | -5.294541 | 1.048611  | 0.879797  | H | -5.247471 | 1.012572  | 0.993218  |
| H | -4.55603  | 2.398403  | 0.000321  | H | -4.533798 | 2.395252  | 0.131109  |
| C | -4.675556 | -1.615474 | -0.000107 | C | -4.670422 | -1.604668 | 0.013043  |
| H | -5.276531 | -1.372168 | 0.881489  | H | -5.255635 | -1.365579 | 0.906809  |
| H | -5.276739 | -1.371685 | -0.881426 | H | -5.279346 | -1.332573 | -0.855377 |
| H | -4.492544 | -2.690667 | -0.000418 | H | -4.48916  | -2.680417 | -0.009548 |
| C | 0.240917  | 2.805275  | 0.000116  | C | 0.226061  | 2.787413  | -0.128289 |
| H | -0.26776  | 3.164982  | -0.896708 | H | -0.399852 | 3.093589  | -0.96642  |
| H | -0.267419 | 3.164908  | 0.897162  | H | -0.170272 | 3.178905  | 0.810374  |
| H | 1.27537   | 3.137808  | -0.000085 | H | 1.241327  | 3.135416  | -0.277493 |
| N | 0.238503  | 1.333846  | 0.000052  | N | 0.240533  | 1.316381  | -0.069    |
| N | 0.243851  | -1.396323 | 0.00003   | N | 0.228978  | -1.403478 | -0.042075 |
| N | 2.575434  | 1.320997  | -0.000076 | N | 2.573607  | 1.322519  | 0.024408  |
| N | 3.737133  | -0.811314 | -0.000083 | N | 3.727955  | -0.785271 | 0.034629  |
| H | 4.644666  | -1.271211 | -0.000026 | H | 4.635258  | -1.248546 | 0.056335  |
| O | 4.852963  | 1.157534  | -0.000114 | O | 4.840873  | 1.174815  | 0.106022  |
| O | 2.549256  | -2.794982 | 0.000161  | O | 2.607695  | -2.785918 | -0.023485 |
| H | 0.317765  | -2.424644 | 0.000095  | H | 0.260217  | -2.434102 | -0.050287 |

| gas | $\text{FL}_{\text{ox}}^- - S_0$ |           |           | water | $\text{FL}_{\text{ox}}^- - S_0$ |           |           |
|-----|---------------------------------|-----------|-----------|-------|---------------------------------|-----------|-----------|
| C   | -3.380648                       | 0.85332   | -0.000072 | C     | -3.373168                       | 0.858482  | 0.000217  |
| C   | -2.160777                       | 1.499523  | -0.000099 | C     | -2.162053                       | 1.510048  | 0.000176  |
| C   | -0.947827                       | 0.788126  | -0.000045 | C     | -0.942113                       | 0.797225  | -0.00002  |
| C   | -0.967083                       | -0.622159 | 0.00003   | C     | -0.959845                       | -0.617743 | -0.000203 |
| C   | -2.205634                       | -1.28348  | 0.000067  | C     | -2.196154                       | -1.285668 | -0.000195 |
| C   | -3.39487                        | -0.567067 | 0.000016  | C     | -3.382663                       | -0.570874 | 0.000022  |
| C   | 1.435788                        | -0.630659 | 0.000074  | C     | 1.42644                         | -0.62811  | -0.000008 |
| C   | 1.334998                        | 0.83251   | 0.000011  | C     | 1.337158                        | 0.817521  | -0.000074 |
| C   | 2.625866                        | 1.597732  | -0.000065 | C     | 2.614348                        | 1.574596  | -0.000211 |
| C   | 3.755299                        | -0.633977 | 0.000285  | C     | 3.732895                        | -0.622104 | 0.000409  |
| H   | -2.094026                       | 2.583713  | -0.000159 | H     | -2.110478                       | 2.595157  | 0.000296  |
| H   | -2.248151                       | -2.366197 | 0.000147  | H     | -2.237837                       | -2.367867 | -0.000307 |

|   |           |           |           |   |           |           |           |
|---|-----------|-----------|-----------|---|-----------|-----------|-----------|
| H | 4.637668  | 1.229535  | -0.000135 | H | 4.63027   | 1.239116  | -0.000167 |
| C | -4.707847 | -1.302315 | 0.000056  | C | -4.692349 | -1.303003 | 0.000019  |
| H | -5.303996 | -1.039948 | 0.880392  | H | -5.285892 | -1.032958 | 0.8801    |
| H | -5.303945 | -1.040127 | -0.880368 | H | -5.28564  | -1.033305 | -0.880346 |
| H | -4.556981 | -2.383287 | 0.00017   | H | -4.538053 | -2.383286 | 0.00024   |
| C | -4.669727 | 1.631956  | -0.00012  | C | -4.666243 | 1.624116  | 0.000491  |
| H | -5.276285 | 1.398759  | -0.881648 | H | -5.268424 | 1.377908  | -0.880392 |
| H | -5.276248 | 1.398921  | 0.881477  | H | -5.267844 | 1.378189  | 0.881854  |
| H | -4.472478 | 2.705423  | -0.000223 | H | -4.476194 | 2.699228  | 0.000271  |
| C | 0.241049  | -2.767081 | 0.000103  | C | 0.2248    | -2.769318 | -0.000814 |
| H | -0.270544 | -3.132125 | 0.894129  | H | -0.293714 | -3.117091 | 0.894096  |
| H | -0.270729 | -3.13216  | -0.8938   | H | -0.294632 | -3.116504 | -0.895412 |
| H | 1.27491   | -3.100318 | 0.000008  | H | 1.247113  | -3.129022 | -0.001476 |
| N | 0.238626  | -1.303754 | 0.000064  | N | 0.244028  | -1.298195 | -0.000385 |
| N | 0.228459  | 1.494244  | -0.000063 | N | 0.226154  | 1.491029  | -0.000077 |
| N | 2.547741  | -1.306926 | 0.000164  | N | 2.562455  | -1.306943 | 0.000366  |
| N | 3.730007  | 0.777525  | -0.000021 | N | 3.722381  | 0.779653  | -0.00023  |
| O | 4.827696  | -1.196663 | -0.000083 | O | 4.833409  | -1.182687 | 0.000976  |
| O | 2.696734  | 2.805614  | -0.000221 | O | 2.682826  | 2.797764  | -0.000391 |

| gas | $FL_{ox}^-$ |           |           | water | $FL_{ox}^-$ |           |           |
|-----|-------------|-----------|-----------|-------|-------------|-----------|-----------|
| C   | -3.352845   | 0.846597  | -0.002361 | C     | 3.342633    | 0.852659  | 0.019311  |
| C   | -2.119471   | 1.484798  | -0.002506 | C     | 2.12622     | 1.501047  | 0.01216   |
| C   | -0.912083   | 0.77904   | -0.000724 | C     | 0.909304    | 0.789805  | -0.005106 |
| C   | -0.941975   | -0.631116 | 0.001453  | C     | 0.928896    | -0.620838 | -0.017555 |
| C   | -2.18615    | -1.283069 | 0.001448  | C     | 2.167198    | -1.286501 | -0.008985 |
| C   | -3.378013   | -0.563326 | -0.000399 | C     | 3.355497    | -0.572146 | 0.009725  |
| C   | 1.473031    | -0.627356 | 0.001031  | C     | -1.462265   | -0.626959 | -0.004375 |
| C   | 1.383961    | 0.845972  | 0.000728  | C     | -1.378398   | 0.825077  | -0.01152  |
| C   | 2.724545    | 1.58294   | 0.003152  | C     | -2.684719   | 1.556632  | -0.024861 |
| C   | 3.814235    | -0.51881  | -0.004156 | C     | -3.768423   | -0.525167 | 0.043784  |
| H   | -2.047741   | 2.569426  | -0.003887 | H     | 2.074543    | 2.586476  | 0.019608  |
| H   | -2.229407   | -2.36695  | 0.002805  | H     | 2.208533    | -2.369152 | -0.013431 |
| C   | -4.695559   | -1.296576 | -0.000315 | C     | 4.666904    | -1.304495 | 0.020062  |
| H   | -5.295413   | -1.037909 | 0.879925  | H     | 5.268302    | -1.036775 | -0.855536 |
| H   | -5.294567   | -1.039655 | -0.881637 | H     | 5.255028    | -1.037694 | 0.904753  |
| H   | -4.542785   | -2.378474 | 0.000848  | H     | 4.512658    | -2.385099 | 0.018167  |
| C   | -4.634717   | 1.641076  | -0.004088 | C     | 4.632786    | 1.625131  | 0.036713  |
| H   | -5.247418   | 1.418651  | -0.885881 | H     | 5.227749    | 1.381078  | 0.923294  |
| H   | -5.248603   | 1.420414  | 0.877326  | H     | 5.246849    | 1.387359  | -0.838482 |
| H   | -4.422171   | 2.712656  | -0.005019 | H     | 4.437609    | 2.699617  | 0.038475  |
| C   | 0.27058     | -2.767571 | 0.006301  | C     | -0.261392   | -2.768773 | -0.074933 |
| H   | -0.237711   | -3.149776 | 0.898375  | H     | 0.30479     | -3.100633 | -0.94682  |
| H   | -0.232683   | -3.153518 | -0.887062 | H     | 0.200079    | -3.153099 | 0.837147  |

|   |          |           |           |   |           |           |           |
|---|----------|-----------|-----------|---|-----------|-----------|-----------|
| H | 1.313402 | -3.079728 | 0.009524  | H | -1.284014 | -3.122383 | -0.144941 |
| N | 0.255938 | -1.315258 | 0.003593  | N | -0.275885 | -1.302726 | -0.038546 |
| N | 0.275205 | 1.499588  | -0.000283 | N | -0.266578 | 1.490562  | -0.013096 |
| N | 2.575945 | -1.275534 | -0.000705 | N | -2.600217 | -1.276886 | 0.026521  |
| N | 3.843322 | 0.841346  | -0.000439 | N | -3.814262 | 0.844222  | 0.00342   |
| O | 4.832125 | -1.204682 | -0.010467 | O | -4.849274 | -1.160259 | 0.093004  |
| O | 2.687748 | 2.814466  | 0.008235  | O | -2.675601 | 2.809168  | -0.062611 |

| gas | $\text{H}_2\text{FL}_{\text{aq}}^+ - \text{S}_0$ |           |           | water | $\text{H}_2\text{FL}_{\text{aq}}^+ - \text{S}_0$ |           |           |
|-----|--------------------------------------------------|-----------|-----------|-------|--------------------------------------------------|-----------|-----------|
| C   | 3.436659                                         | 0.820024  | 0.019758  | C     | 3.430471                                         | 0.819329  | 0.030139  |
| C   | 2.228928                                         | 1.492637  | -0.05136  | C     | 2.22738                                          | 1.4971    | -0.051801 |
| C   | 1.015621                                         | 0.795998  | -0.076785 | C     | 1.015                                            | 0.798286  | -0.092695 |
| C   | 1.00436                                          | -0.616199 | -0.045985 | C     | 1.000492                                         | -0.612202 | -0.066162 |
| C   | 2.224027                                         | -1.289524 | 0.050061  | C     | 2.21683                                          | -1.291538 | 0.038697  |
| C   | 3.431665                                         | -0.598603 | 0.082746  | C     | 3.422094                                         | -0.599485 | 0.086741  |
| C   | -1.38549                                         | -0.596956 | -0.032995 | C     | -1.379158                                        | -0.586403 | -0.054675 |
| C   | -1.365581                                        | 0.787261  | -0.048033 | C     | -1.362668                                        | 0.803255  | -0.071242 |
| C   | -2.595438                                        | 1.579168  | -0.008862 | C     | -2.590783                                        | 1.566216  | -0.008819 |
| C   | -3.83597                                         | -0.558928 | 0.117593  | C     | -3.798312                                        | -0.568493 | 0.131538  |
| H   | -0.246814                                        | 2.476459  | -0.144544 | H     | -0.201568                                        | 2.48733   | -0.168403 |
| H   | 2.208631                                         | 2.578703  | -0.084163 | H     | 2.199671                                         | 2.582968  | -0.081088 |
| H   | 2.248862                                         | -2.370456 | 0.119303  | H     | 2.237446                                         | -2.372803 | 0.096707  |
| H   | -4.637995                                        | 1.319083  | 0.08979   | H     | -4.628915                                        | 1.294204  | 0.127755  |
| H   | -2.676059                                        | -2.222686 | 0.193355  | H     | -2.641138                                        | -2.232272 | 0.155351  |
| C   | 4.726555                                         | -1.352869 | 0.187776  | C     | 4.715604                                         | -1.353205 | 0.199974  |
| H   | 5.371971                                         | -1.139169 | -0.670342 | H     | 5.370043                                         | -1.128791 | -0.649318 |
| H   | 5.278764                                         | -1.058774 | 1.086093  | H     | 5.257408                                         | -1.06328  | 1.106679  |
| H   | 4.559116                                         | -2.429998 | 0.228193  | H     | 4.540363                                         | -2.430128 | 0.22846   |
| C   | 4.733036                                         | 1.579229  | 0.04326   | C     | 4.729126                                         | 1.572023  | 0.067082  |
| H   | 5.296038                                         | 1.364157  | 0.95692   | H     | 5.294529                                         | 1.332402  | 0.973635  |
| H   | 5.366885                                         | 1.295007  | -0.802618 | H     | 5.35935                                          | 1.299949  | -0.786437 |
| H   | 4.562138                                         | 2.655343  | -0.00618  | H     | 4.554939                                         | 2.649266  | 0.040511  |
| C   | -0.241557                                        | -2.757977 | -0.296744 | C     | -0.247517                                        | -2.753229 | -0.28695  |
| H   | 0.590172                                         | -3.036767 | -0.941567 | H     | 0.604887                                         | -3.052488 | -0.89201  |
| H   | -0.156206                                        | -3.273263 | 0.66432   | H     | -0.201773                                        | -3.230044 | 0.694689  |
| H   | -1.154377                                        | -3.056625 | -0.810951 | H     | -1.143701                                        | -3.059344 | -0.822988 |
| N   | -0.228822                                        | -1.303051 | -0.119269 | N     | -0.23105                                         | -1.291423 | -0.151557 |
| N   | -0.188275                                        | 1.458825  | -0.122658 | N     | -0.180693                                        | 1.467951  | -0.150194 |
| N   | -2.594735                                        | -1.224424 | 0.046584  | N     | -2.582893                                        | -1.223151 | 0.047445  |
| N   | -3.753009                                        | 0.820789  | 0.049172  | N     | -3.738809                                        | 0.802432  | 0.071618  |
| O   | -4.861367                                        | -1.173848 | 0.226427  | O     | -4.84679                                         | -1.182317 | 0.248929  |
| O   | -2.578398                                        | 2.790654  | -0.038552 | O     | -2.620557                                        | 2.792622  | -0.03339  |

| gas | HFL <sub>sq</sub> -S <sub>0</sub> |           |           | water | HFL <sub>sq</sub> -S <sub>0</sub> |           |           |
|-----|-----------------------------------|-----------|-----------|-------|-----------------------------------|-----------|-----------|
| C   | -3.41208                          | 0.821144  | 0.000037  | C     | 3.405709                          | 0.826195  | 0.009272  |
| C   | -2.19518                          | 1.489691  | 0.000034  | C     | 2.195139                          | 1.498168  | -0.02184  |
| C   | -0.984654                         | 0.794495  | 0.000012  | C     | 0.983904                          | 0.796306  | -0.035135 |
| C   | -0.969109                         | -0.615596 | -0.000007 | C     | 0.969626                          | -0.612655 | -0.024934 |
| C   | -2.200376                         | -1.280018 | 0.000004  | C     | 2.197347                          | -1.284604 | 0.017718  |
| C   | -3.410593                         | -0.58871  | 0.000025  | C     | 3.403311                          | -0.590798 | 0.036013  |
| C   | 1.458353                          | -0.63604  | 0.000011  | C     | -1.44408                          | -0.624098 | -0.017508 |
| C   | 1.401702                          | 0.783071  | 0.00002   | C     | -1.396865                         | 0.787234  | -0.02376  |
| C   | 2.626071                          | 1.555097  | -0.000003 | C     | -2.621513                         | 1.53714   | 0.000215  |
| C   | 3.779099                          | -0.648065 | 0.000227  | C     | -3.754298                         | -0.641322 | 0.048446  |
| H   | 0.291896                          | 2.471194  | -0.000008 | H     | -0.244731                         | 2.478244  | -0.062946 |
| H   | -2.170638                         | 2.576795  | 0.000045  | H     | 2.163281                          | 2.584608  | -0.035998 |
| H   | -2.223792                         | -2.363226 | 0.000005  | H     | 2.221968                          | -2.367341 | 0.039028  |
| H   | 4.650917                          | 1.23067   | -0.00007  | H     | -4.64783                          | 1.222578  | 0.053872  |
| C   | -4.710337                         | -1.349455 | 0.000025  | C     | 4.702243                          | -1.345603 | 0.083557  |
| H   | -5.313249                         | -1.103826 | 0.880865  | H     | 5.325043                          | -1.108278 | -0.785853 |
| H   | -5.313106                         | -1.104055 | -0.88098  | H     | 5.280316                          | -1.075743 | 0.974072  |
| H   | -4.535722                         | -2.4271   | 0.000178  | H     | 4.527504                          | -2.423248 | 0.099106  |
| C   | -4.706956                         | 1.589838  | 0.000069  | C     | 4.702389                          | 1.586362  | 0.016247  |
| H   | -5.311202                         | 1.349071  | -0.881021 | H     | 5.293859                          | 1.347102  | 0.906386  |
| H   | -5.311006                         | 1.349313  | 0.881362  | H     | 5.313346                          | 1.325784  | -0.85477  |
| H   | -4.524031                         | 2.666192  | -0.000098 | H     | 4.521529                          | 2.663083  | 0.000924  |
| C   | 0.24041                           | -2.76609  | -0.000101 | C     | -0.22434                          | -2.76283  | -0.110102 |
| H   | -0.270896                         | -3.136189 | 0.893631  | H     | 0.383111                          | -3.083943 | -0.958319 |
| H   | -0.271055                         | -3.136103 | -0.893776 | H     | 0.196825                          | -3.158378 | 0.817616  |
| H   | 1.273523                          | -3.103545 | -0.000202 | H     | -1.237944                         | -3.127018 | -0.232498 |
| N   | 0.247675                          | -1.308438 | -0.000044 | N     | -0.25133                          | -1.300595 | -0.063446 |
| N   | 0.226746                          | 1.456292  | 0.00001   | N     | -0.218079                         | 1.45988   | -0.056235 |
| N   | 2.575527                          | -1.319519 | 0.00005   | N     | -2.582667                         | -1.315746 | 0.02174   |
| N   | 3.749292                          | 0.768642  | 0.00003   | N     | -3.74596                          | 0.754137  | 0.032856  |
| O   | 4.859957                          | -1.201466 | -0.000168 | O     | -4.858953                         | -1.211618 | 0.087597  |
| O   | 2.631992                          | 2.783441  | -0.000129 | O     | -2.66873                          | 2.776849  | -0.009366 |

| gas | FL <sub>sq</sub> <sup>-</sup> -S <sub>0</sub> |           |           | water | FL <sub>sq</sub> <sup>-</sup> -S <sub>0</sub> |           |           |
|-----|-----------------------------------------------|-----------|-----------|-------|-----------------------------------------------|-----------|-----------|
| C   | 3.40669                                       | 0.830756  | 0.000064  | C     | 3.402626                                      | 0.836567  | 0.003347  |
| C   | 2.189379                                      | 1.499073  | 0.000048  | C     | 2.187119                                      | 1.503379  | -0.01106  |
| C   | 0.94585                                       | 0.827992  | 0.000018  | C     | 0.947777                                      | 0.827567  | -0.015289 |
| C   | 0.974275                                      | -0.598393 | -0.000021 | C     | 0.968887                                      | -0.591643 | -0.009799 |
| C   | 2.199221                                      | -1.268015 | 0.000019  | C     | 2.193326                                      | -1.266616 | 0.011628  |
| C   | 3.417529                                      | -0.576162 | 0.000057  | C     | 3.406783                                      | -0.576917 | 0.018723  |
| C   | -1.447092                                     | -0.575573 | -0.000017 | C     | -1.435672                                     | -0.585289 | -0.007419 |
| C   | -1.356559                                     | 0.843666  | 0.000057  | C     | -1.36092                                      | 0.831428  | -0.009862 |
| C   | -2.620565                                     | 1.572317  | 0.000145  | C     | -2.611885                                     | 1.545559  | -0.000566 |

|   |           |           |           |   |           |           |           |
|---|-----------|-----------|-----------|---|-----------|-----------|-----------|
| C | -3.75867  | -0.660079 | 0.000003  | C | -3.744299 | -0.637832 | 0.023144  |
| H | 2.149839  | 2.585302  | 0.00007   | H | 2.161233  | 2.590459  | -0.019502 |
| H | 2.222897  | -2.352877 | 0.000017  | H | 2.217958  | -2.350377 | 0.023263  |
| H | -4.637227 | 1.199341  | -0.000017 | H | -4.638337 | 1.217139  | 0.021858  |
| C | 4.718711  | -1.337501 | 0.000146  | C | 4.705965  | -1.335783 | 0.041126  |
| H | 5.329555  | -1.100639 | -0.880411 | H | 5.320473  | -1.097435 | -0.834518 |
| H | 5.329142  | -1.101124 | 0.881126  | H | 5.300966  | -1.080173 | 0.925293  |
| H | 4.5387    | -2.416116 | -0.000192 | H | 4.528258  | -2.413677 | 0.049792  |
| C | 4.702881  | 1.603556  | 0.000092  | C | 4.699318  | 1.601797  | 0.003397  |
| H | 5.312699  | 1.369099  | 0.881295  | H | 5.300702  | 1.364622  | 0.88798   |
| H | 5.312502  | 1.369481  | -0.881351 | H | 5.307826  | 1.350987  | -0.872599 |
| H | 4.510795  | 2.679374  | 0.000342  | H | 4.514557  | 2.678484  | -0.005848 |
| C | -0.245783 | -2.726567 | -0.000282 | C | -0.226444 | -2.741084 | -0.057312 |
| H | 0.270843  | -3.104916 | -0.891175 | H | 0.341997  | -3.082928 | -0.926017 |
| H | 0.270513  | -3.105157 | 0.890704  | H | 0.240889  | -3.1251   | 0.854001  |
| H | -1.280524 | -3.059573 | -0.000501 | H | -1.243644 | -3.110514 | -0.123819 |
| N | -0.243997 | -1.278151 | -0.000117 | N | -0.251592 | -1.282023 | -0.031361 |
| N | -0.200515 | 1.547685  | 0.000033  | N | -0.207346 | 1.551158  | -0.023543 |
| N | -2.557889 | -1.303181 | -0.00005  | N | -2.573137 | -1.297335 | 0.011815  |
| N | -3.736477 | 0.739623  | 0.000056  | N | -3.737724 | 0.748122  | 0.013615  |
| O | -4.850124 | -1.231263 | -0.000178 | O | -4.855606 | -1.218932 | 0.041953  |
| O | -2.763976 | 2.791957  | 0.000011  | O | -2.739365 | 2.787964  | -0.00619  |

| gas | $\text{H}_2\text{FLH}_{\text{red}}^+ - \text{S}_0$ |           |           | water | $\text{H}_2\text{FLH}_{\text{red}}^+ - \text{S}_0$ |           |           |
|-----|----------------------------------------------------|-----------|-----------|-------|----------------------------------------------------|-----------|-----------|
| C   | 3.399887                                           | -0.799276 | -0.14451  | C     | 3.393022                                           | -0.797322 | -0.15123  |
| C   | 2.209665                                           | -1.471065 | 0.12201   | C     | 2.208834                                           | -1.476935 | 0.127397  |
| C   | 1.03467                                            | -0.764198 | 0.324215  | C     | 1.037868                                           | -0.771575 | 0.346334  |
| C   | 0.984259                                           | 0.62769   | 0.26751   | C     | 0.986419                                           | 0.617722  | 0.291182  |
| C   | 2.178207                                           | 1.297695  | -0.008868 | C     | 2.170462                                           | 1.298226  | 0.000002  |
| C   | 3.375502                                           | 0.609502  | -0.206748 | C     | 3.36547                                            | 0.609885  | -0.212369 |
| C   | -1.379525                                          | 0.606403  | 0.215799  | C     | -1.368431                                          | 0.586927  | 0.21928   |
| C   | -1.390231                                          | -0.759871 | 0.256713  | C     | -1.377597                                          | -0.788336 | 0.234409  |
| C   | -2.544786                                          | -1.55949  | -0.042738 | C     | -2.542149                                          | -1.548311 | -0.05373  |
| C   | -3.760689                                          | 0.565845  | -0.379296 | C     | -3.717292                                          | 0.583693  | -0.390292 |
| H   | 2.202366                                           | -2.557507 | 0.179107  | H     | 2.19323                                            | -2.56257  | 0.183826  |
| H   | 2.181954                                           | 2.378366  | -0.09627  | H     | 2.167107                                           | 2.379122  | -0.084865 |
| C   | 4.637576                                           | 1.372162  | -0.502727 | C     | 4.622441                                           | 1.373475  | -0.525405 |
| H   | 5.395692                                           | 1.181231  | 0.263502  | H     | 5.396624                                           | 1.172131  | 0.222675  |
| H   | 5.063624                                           | 1.06255   | -1.462096 | H     | 5.028766                                           | 1.0708    | -1.496415 |
| H   | 4.455502                                           | 2.446988  | -0.540796 | H     | 4.433077                                           | 2.448306  | -0.547244 |
| C   | 4.677843                                           | -1.560768 | -0.363294 | C     | 4.672167                                           | -1.551712 | -0.383736 |
| H   | 5.082244                                           | -1.368972 | -1.362232 | H     | 5.071311                                           | -1.346514 | -1.382939 |
| H   | 5.442831                                           | -1.259707 | 0.359262  | H     | 5.440246                                           | -1.251527 | 0.337148  |
| H   | 4.521238                                           | -2.635933 | -0.262873 | H     | 4.512125                                           | -2.627712 | -0.290415 |

|   |           |           |           |   |           |           |           |
|---|-----------|-----------|-----------|---|-----------|-----------|-----------|
| C | -0.258878 | 2.774398  | 0.571381  | C | -0.263402 | 2.756434  | 0.590511  |
| H | 0.570393  | 3.071823  | 1.212869  | H | 0.579992  | 3.059297  | 1.209187  |
| H | -0.17185  | 3.27894   | -0.396623 | H | -0.200854 | 3.242375  | -0.3872   |
| H | -1.176654 | 3.078171  | 1.076322  | H | -1.168994 | 3.065352  | 1.112066  |
| N | -0.242356 | 1.318654  | 0.433636  | N | -0.24476  | 1.297011  | 0.469133  |
| N | -0.204205 | -1.495464 | 0.663151  | N | -0.195591 | -1.498194 | 0.692543  |
| N | -2.556657 | 1.235374  | -0.07113  | N | -2.53473  | 1.233072  | -0.084667 |
| N | -3.679088 | -0.815533 | -0.334297 | N | -3.66194  | -0.784826 | -0.361939 |
| O | -4.7538   | 1.179164  | -0.663236 | O | -4.731339 | 1.206656  | -0.67323  |
| O | -2.515018 | -2.779371 | -0.027506 | O | -2.595315 | -2.78173  | -0.029297 |
| H | -2.600168 | 2.232579  | -0.241108 | H | -2.558507 | 2.241419  | -0.211176 |
| H | -4.532158 | -1.319247 | -0.558586 | H | -4.524365 | -1.279832 | -0.577278 |
| H | -0.258734 | -2.412782 | 0.188249  | H | -0.186569 | -2.43559  | 0.260819  |
| H | -0.23061  | -1.71021  | 1.671004  | H | -0.237678 | -1.656928 | 1.712414  |

| gas | $\text{H}_2\text{FL}_{\text{red}}\text{-S}_0$ |           |           | water | $\text{H}_2\text{FL}_{\text{red}}\text{-S}_0$ |           |           |
|-----|-----------------------------------------------|-----------|-----------|-------|-----------------------------------------------|-----------|-----------|
| C   | 3.383093                                      | 0.795065  | 0.142841  | C     | 3.371764                                      | 0.798317  | 0.14924   |
| C   | 2.198887                                      | 1.475868  | -0.159768 | C     | 2.190922                                      | 1.480831  | -0.164967 |
| C   | 1.005814                                      | 0.801561  | -0.385028 | C     | 1.005222                                      | 0.799696  | -0.410681 |
| C   | 0.987988                                      | -0.60062  | -0.292737 | C     | 0.983776                                      | -0.59891  | -0.328125 |
| C   | 2.152519                                      | -1.278988 | 0.043495  | C     | 2.145012                                      | -1.282743 | 0.016636  |
| C   | 3.360364                                      | -0.600042 | 0.251172  | C     | 3.347286                                      | -0.60078  | 0.244586  |
| C   | -1.384057                                     | -0.555152 | -0.261608 | C     | -1.375634                                     | -0.557226 | -0.268667 |
| C   | -1.362943                                     | 0.800441  | -0.324909 | C     | -1.35625                                      | 0.811564  | -0.315813 |
| C   | -2.524919                                     | 1.569857  | 0.023509  | C     | -2.511594                                     | 1.555311  | 0.034748  |
| C   | -3.72575                                      | -0.575794 | 0.424591  | C     | -3.691982                                     | -0.571358 | 0.428143  |
| H   | -0.220127                                     | 2.452058  | -0.55231  | H     | -0.186649                                     | 2.449011  | -0.536035 |
| H   | 2.207118                                      | 2.56065   | -0.236941 | H     | 2.191988                                      | 2.566611  | -0.231227 |
| H   | 2.139955                                      | -2.359666 | 0.146179  | H     | 2.132442                                      | -2.363587 | 0.1111    |
| H   | -4.495817                                     | 1.301096  | 0.585811  | H     | -4.478556                                     | 1.29567   | 0.619937  |
| H   | -2.549149                                     | -2.216522 | 0.257639  | H     | -2.539629                                     | -2.225151 | 0.209537  |
| C   | 4.613021                                      | -1.367493 | 0.588719  | C     | 4.595827                                      | -1.367358 | 0.593914  |
| H   | 5.388144                                      | -1.223874 | -0.172467 | H     | 5.388418                                      | -1.194814 | -0.142896 |
| H   | 5.037105                                      | -1.039587 | 1.544156  | H     | 4.99318                                       | -1.057239 | 1.566893  |
| H   | 4.410335                                      | -2.438545 | 0.661768  | H     | 4.396126                                      | -2.440739 | 0.633029  |
| C   | 4.663227                                      | 1.560486  | 0.356648  | C     | 4.64882                                       | 1.558445  | 0.38893   |
| H   | 5.062073                                      | 1.39636   | 1.363796  | H     | 5.040151                                      | 1.367591  | 1.394457  |
| H   | 5.437761                                      | 1.244578  | -0.350949 | H     | 5.428057                                      | 1.254472  | -0.319049 |
| H   | 4.506244                                      | 2.633455  | 0.227337  | H     | 4.490134                                      | 2.633889  | 0.281725  |
| C   | -0.266069                                     | -2.717771 | -0.663723 | C     | -0.274226                                     | -2.728681 | -0.621873 |
| H   | 0.572964                                      | -3.034618 | -1.285844 | H     | 0.57531                                       | -3.07708  | -1.208735 |
| H   | -0.188987                                     | -3.222778 | 0.31079   | H     | -0.221107                                     | -3.163507 | 0.383219  |
| H   | -1.180478                                     | -3.033325 | -1.170591 | H     | -1.175593                                     | -3.072224 | -1.130317 |
| N   | -0.243402                                     | -1.274438 | -0.559846 | N     | -0.2522                                       | -1.270848 | -0.595953 |



|   |           |           |           |   |           |           |          |
|---|-----------|-----------|-----------|---|-----------|-----------|----------|
| N | -0.185468 | 1.456374  | -0.744319 | N | -0.18746  | 1.463371  | -0.78741 |
| N | -2.540782 | -1.219872 | 0.09557   | N | -2.523155 | -1.215452 | 0.103632 |
| N | -3.652087 | 0.79604   | 0.342355  | N | -3.629825 | 0.792262  | 0.375355 |
| O | -4.7226   | -1.18777  | 0.755214  | O | -4.709104 | -1.188802 | 0.746906 |
| O | -2.575152 | 2.791455  | 0.029297  | O | -2.585828 | 2.79619   | 0.030914 |

| gas | $\text{HFL}_{\text{red}}^- \text{-S}_0$ |           |           | water | $\text{HFL}_{\text{red}}^- \text{-S}_0$ |           |           |
|-----|-----------------------------------------|-----------|-----------|-------|-----------------------------------------|-----------|-----------|
| C   | 3.382735                                | 0.796941  | 0.113839  | C     | 3.346223                                | 0.802718  | 0.141508  |
| C   | 2.181058                                | 1.4777    | -0.123901 | C     | 2.159832                                | 1.478562  | -0.167503 |
| C   | 0.975705                                | 0.809851  | -0.317349 | C     | 0.974503                                | 0.79363   | -0.408712 |
| C   | 0.954556                                | -0.606445 | -0.250473 | C     | 0.951104                                | -0.608175 | -0.326531 |
| C   | 2.148081                                | -1.274392 | 0.013829  | C     | 2.124125                                | -1.281671 | 0.010541  |
| C   | 3.366543                                | -0.595841 | 0.185261  | C     | 3.325944                                | -0.595752 | 0.23404   |
| C   | -1.461589                               | -0.587926 | -0.211738 | C     | -1.436528                               | -0.592652 | -0.258712 |
| C   | -1.404378                               | 0.790861  | -0.261504 | C     | -1.387781                               | 0.79388   | -0.309343 |
| C   | -2.562323                               | 1.543088  | 0.04058   | C     | -2.52893                                | 1.527724  | 0.048866  |
| C   | -3.708059                               | -0.660232 | 0.31243   | C     | -3.646915                               | -0.634017 | 0.397566  |
| H   | -0.254098                               | 2.452128  | -0.408723 | H     | -0.218111                               | 2.43533   | -0.53636  |
| H   | 2.181259                                | 2.564916  | -0.176426 | H     | 2.15578                                 | 2.56471   | -0.233399 |
| H   | 2.148388                                | -2.357006 | 0.084182  | H     | 2.122247                                | -2.362752 | 0.100398  |
| H   | -4.536051                               | 1.217192  | 0.519489  | H     | -4.478027                               | 1.232987  | 0.649523  |
| C   | 4.633287                                | -1.371788 | 0.44868   | C     | 4.579089                                | -1.359551 | 0.575819  |
| H   | 5.389671                                | -1.193145 | -0.326121 | H     | 5.369376                                | -1.182393 | -0.162598 |
| H   | 5.088846                                | -1.093548 | 1.407439  | H     | 4.979716                                | -1.053419 | 1.548923  |
| H   | 4.432555                                | -2.446305 | 0.47572   | H     | 4.383281                                | -2.43396  | 0.611271  |
| C   | 4.667628                                | 1.565575  | 0.29666   | C     | 4.621117                                | 1.568773  | 0.377711  |
| H   | 5.111043                                | 1.383521  | 1.283475  | H     | 5.016317                                | 1.382936  | 1.382851  |
| H   | 5.420035                                | 1.278151  | -0.448304 | H     | 5.401382                                | 1.268821  | -0.33107  |
| H   | 4.495978                                | 2.641061  | 0.200784  | H     | 4.457346                                | 2.643537  | 0.269089  |
| C   | -0.266147                               | -2.726828 | -0.425866 | C     | -0.273401                               | -2.736605 | -0.548694 |
| H   | 0.448698                                | -3.122037 | -1.155634 | H     | 0.538271                                | -3.11235  | -1.173468 |
| H   | 0.002819                                | -3.103268 | 0.573643  | H     | -0.14492                                | -3.1164   | 0.473165  |
| H   | -1.272676                               | -3.067108 | -0.658609 | H     | -1.215782                               | -3.105986 | -0.944679 |
| N   | -0.258665                               | -1.282174 | -0.481328 | N     | -0.273299                               | -1.282002 | -0.599936 |
| N   | -0.206672                               | 1.464097  | -0.633151 | N     | -0.216583                               | 1.449636  | -0.786253 |
| N   | -2.54463                                | -1.318888 | 0.060228  | N     | -2.524529                               | -1.306691 | 0.08339   |
| N   | -3.666037                               | 0.745197  | 0.315089  | N     | -3.62305                                | 0.74948   | 0.393916  |
| O   | -4.789683                               | -1.209669 | 0.547946  | O     | -4.725135                               | -1.208328 | 0.705673  |
| O   | -2.631194                               | 2.787724  | 0.06212   | O     | -2.619233                               | 2.786428  | 0.057977  |

| water | $\text{FLH}_{\text{ox}}^+ \text{N5-S}_1$ |           |           |
|-------|------------------------------------------|-----------|-----------|
| C     | -3.410805                                | -0.820546 | 0.005953  |
| C     | -2.167375                                | -1.497881 | -0.041588 |

|   |           |           |           |
|---|-----------|-----------|-----------|
| C | -0.965454 | -0.807943 | -0.057353 |
| C | -0.960492 | 0.606628  | -0.041507 |
| C | -2.210324 | 1.277687  | 0.017908  |
| C | -3.420894 | 0.594948  | 0.047145  |
| C | 1.433493  | 0.606505  | -0.046736 |
| C | 1.408774  | -0.812742 | -0.040547 |
| C | 2.646912  | -1.550656 | 0.0236    |
| C | 3.767112  | 0.633601  | 0.032942  |
| H | -2.149702 | -2.581388 | -0.064551 |
| H | -2.226143 | 2.357436  | 0.044783  |
| C | -4.71339  | 1.353586  | 0.118207  |
| H | -5.346936 | 1.126542  | -0.744924 |
| H | -5.280665 | 1.074022  | 1.011528  |
| H | -4.535078 | 2.428709  | 0.143598  |
| C | -4.674357 | -1.605013 | 0.012036  |
| H | -5.271611 | -1.364869 | 0.90004   |
| H | -5.297785 | -1.332612 | -0.848762 |
| H | -4.48575  | -2.67749  | -0.011616 |
| C | 0.226465  | 2.774443  | -0.121138 |
| H | -0.353622 | 3.104178  | -0.983055 |
| H | -0.212171 | 3.162722  | 0.798947  |
| H | 1.24731   | 3.121906  | -0.211477 |
| N | 0.233244  | 1.299582  | -0.080319 |
| N | 0.235177  | -1.480489 | -0.079983 |
| N | 2.555642  | 1.301256  | -0.021959 |
| N | 3.771028  | -0.749963 | 0.071207  |
| H | 4.675081  | -1.211855 | 0.111535  |
| O | 4.82589   | 1.25895   | 0.050346  |
| O | 2.707508  | -2.783124 | 0.039315  |
| H | 0.252584  | -2.498441 | -0.077782 |

| Water | <b>FL<sub>ox</sub>-S<sub>1</sub></b> |           |           |
|-------|--------------------------------------|-----------|-----------|
| C     | 3.397558                             | 0.835632  | -0.000007 |
| C     | 2.155597                             | 1.508516  | -0.000114 |
| C     | 0.933866                             | 0.84254   | -0.000135 |
| C     | 0.964555                             | -0.592069 | -0.00012  |
| C     | 2.209697                             | -1.267461 | 0.00003   |
| C     | 3.418909                             | -0.586297 | 0.000105  |
| C     | -1.424532                            | -0.568778 | -0.000212 |
| C     | -1.366954                            | 0.85787   | -0.000209 |
| C     | -2.631927                            | 1.563633  | -0.000523 |
| C     | -3.754054                            | -0.625353 | 0.000445  |
| H     | 2.141448                             | 2.592063  | -0.000184 |

|   |           |           |           |
|---|-----------|-----------|-----------|
| H | 2.226705  | -2.348082 | 0.000099  |
| H | -4.662724 | 1.212857  | 0.000439  |
| C | 4.7173    | -1.341417 | 0.000283  |
| H | 5.321225  | -1.092506 | -0.878604 |
| H | 5.321062  | -1.092375 | 0.879245  |
| H | 4.541434  | -2.417889 | 0.000347  |
| C | 4.663671  | 1.622686  | -0.000015 |
| H | 5.275967  | 1.373377  | 0.875097  |
| H | 5.276009  | 1.37328   | -0.875071 |
| H | 4.470717  | 2.695196  | -0.000082 |
| C | -0.227544 | -2.754071 | -0.00033  |
| H | 0.283808  | -3.118093 | -0.892763 |
| H | 0.283444  | -3.118181 | 0.892278  |
| H | -1.252654 | -3.10115  | -0.00055  |
| N | -0.227036 | -1.28197  | -0.000255 |
| N | -0.223697 | 1.568785  | -0.000221 |
| N | -2.539419 | -1.279509 | -0.000082 |
| N | -3.759577 | 0.749318  | 0.000164  |
| O | -4.815341 | -1.261063 | 0.000076  |
| O | -2.764088 | 2.797687  | 0.00035   |

| water | <b>FL<sub>ox</sub>-S<sub>1</sub></b> |           |           |
|-------|--------------------------------------|-----------|-----------|
| C     | 3.362118                             | 0.84001   | -0.000006 |
| C     | 2.131999                             | 1.508202  | -0.000012 |
| C     | 0.902941                             | 0.84011   | -0.000014 |
| C     | 0.936322                             | -0.601676 | -0.000002 |
| C     | 2.176725                             | -1.272417 | 0         |
| C     | 3.383726                             | -0.585255 | -0.000003 |
| C     | -1.451456                            | -0.564461 | 0.000008  |
| C     | -1.40383                             | 0.851372  | -0.000017 |
| C     | -2.697351                            | 1.532613  | -0.000049 |
| C     | -3.791092                            | -0.540447 | 0.000027  |
| H     | 2.112917                             | 2.592016  | -0.000015 |
| H     | 2.197782                             | -2.353252 | 0.000005  |
| C     | 4.684954                             | -1.337146 | -0.000002 |
| H     | 5.289876                             | -1.087872 | -0.878468 |
| H     | 5.289869                             | -1.087882 | 0.878472  |
| H     | 4.512705                             | -2.414514 | -0.000008 |
| C     | 4.637863                             | 1.622917  | -0.000003 |
| H     | 5.248561                             | 1.378127  | 0.876532  |
| H     | 5.248558                             | 1.378138  | -0.876543 |
| H     | 4.445389                             | 2.69617   | 0.000003  |
| C     | -0.264361                            | -2.756069 | 0.000026  |

|   |           |           |           |
|---|-----------|-----------|-----------|
| H | 0.246472  | -3.125117 | -0.89137  |
| H | 0.246482  | -3.125102 | 0.891422  |
| H | -1.291523 | -3.098686 | 0.000034  |
| N | -0.259019 | -1.286972 | 0.000011  |
| N | -0.252206 | 1.562922  | -0.000025 |
| N | -2.579216 | -1.258094 | 0.000019  |
| N | -3.847453 | 0.803544  | -0.000026 |
| O | -4.839642 | -1.246963 | 0.000068  |
| O | -2.749263 | 2.797316  | -0.000094 |

| water | $\text{H}_2\text{FL}_{\text{aq}}^+-\text{S}_1$ |           |           |
|-------|------------------------------------------------|-----------|-----------|
| C     | 3.446431                                       | 0.783125  | 0.030431  |
| C     | 2.196498                                       | 1.477167  | -0.225334 |
| C     | 0.989666                                       | 0.811946  | -0.362678 |
| C     | 0.982576                                       | -0.585385 | -0.255285 |
| C     | 2.194738                                       | -1.258705 | 0.041669  |
| C     | 3.43038                                        | -0.597227 | 0.166653  |
| C     | -1.383437                                      | -0.547658 | -0.179119 |
| C     | -1.385281                                      | 0.818158  | -0.259777 |
| C     | -2.563904                                      | 1.557438  | 0.048558  |
| C     | -3.712389                                      | -0.58806  | 0.486377  |
| H     | -0.206632                                      | 2.482094  | -0.493392 |
| H     | 2.218818                                       | 2.555004  | -0.34004  |
| H     | 2.166877                                       | -2.330697 | 0.187258  |
| H     | -4.538044                                      | 1.268771  | 0.593377  |
| H     | -2.507752                                      | -2.226236 | 0.291274  |
| C     | 4.681439                                       | -1.38304  | 0.448544  |
| H     | 5.396104                                       | -1.294741 | -0.375984 |
| H     | 5.182282                                       | -1.014334 | 1.348569  |
| H     | 4.454497                                       | -2.440325 | 0.589744  |
| C     | 4.700134                                       | 1.581272  | 0.141889  |
| H     | 5.121637                                       | 1.488521  | 1.151141  |
| H     | 5.466687                                       | 1.201093  | -0.542424 |
| H     | 4.528975                                       | 2.637136  | -0.06515  |
| C     | -0.251316                                      | -2.731581 | -0.631462 |
| H     | 0.6057                                         | -3.024661 | -1.233922 |
| H     | -0.231757                                      | -3.269093 | 0.320535  |
| H     | -1.148079                                      | -2.999411 | -1.188404 |
| N     | -0.217825                                      | -1.276739 | -0.442022 |
| N     | -0.201659                                      | 1.478333  | -0.642083 |
| N     | -2.506783                                      | -1.215324 | 0.201145  |
| N     | -3.674579                                      | 0.775571  | 0.387611  |

|   |           |           |          |
|---|-----------|-----------|----------|
| O | -4.711453 | -1.227054 | 0.796712 |
| O | -2.65097  | 2.792292  | 0.0134   |

| Water | <b>HFL<sub>sq</sub>-S<sub>1</sub></b> |           |           |
|-------|---------------------------------------|-----------|-----------|
| C     | -0.18728                              | 0.223461  | 0.000062  |
| C     | -1.439099                             | 0.912953  | -0.000071 |
| C     | -2.644515                             | 0.251282  | -0.000142 |
| C     | -2.641037                             | -1.174858 | -0.000069 |
| C     | -1.401186                             | -1.847864 | 0.000094  |
| C     | -0.175864                             | -1.179598 | 0.000167  |
| C     | -5.070713                             | -1.164376 | 0.000055  |
| C     | -5.05644                              | 0.229842  | -0.000056 |
| C     | -6.285127                             | 0.92526   | 0.000098  |
| C     | -7.397849                             | -1.261928 | 0.000487  |
| H     | -1.438172                             | 1.997263  | -0.000158 |
| H     | -1.393105                             | -2.928642 | 0.000163  |
| H     | -8.321669                             | 0.570862  | 0.000549  |
| C     | 1.113963                              | -1.956689 | 0.000339  |
| H     | 1.722835                              | -1.722398 | -0.878994 |
| H     | 1.722658                              | -1.722309 | 0.879771  |
| H     | 0.920222                              | -3.030655 | 0.000375  |
| C     | 1.080604                              | 1.01461   | 0.000074  |
| H     | 1.69295                               | 0.770367  | 0.876096  |
| H     | 1.69301                               | 0.770283  | -0.875883 |
| H     | 0.886086                              | 2.087282  | 0.000014  |
| C     | -3.83186                              | -3.345725 | -0.000373 |
| H     | -3.321754                             | -3.716262 | -0.892034 |
| H     | -3.322059                             | -3.716488 | 0.891372  |
| H     | -4.855476                             | -3.69938  | -0.000589 |
| N     | -3.841801                             | -1.879587 | -0.000215 |
| N     | -3.852047                             | 0.932333  | -0.000371 |
| N     | -6.175903                             | -1.894812 | 0.000235  |
| N     | -7.417758                             | 0.110322  | 0.000398  |
| O     | -8.457125                             | -1.913722 | 0.000596  |
| O     | -6.402587                             | 2.174054  | 0.000191  |
| H     | -3.872196                             | 1.941029  | -0.000394 |

| water | <b>FL<sub>sq</sub><sup>-</sup>-S<sub>1</sub></b> |          |          |
|-------|--------------------------------------------------|----------|----------|
| C     | -3.399393                                        | 0.854584 | 0.000143 |

|   |           |           |           |
|---|-----------|-----------|-----------|
| C | -2.180238 | 1.49539   | 0.000235  |
| C | -0.949112 | 0.802245  | 0.000273  |
| C | -0.962508 | -0.650408 | 0.000186  |
| C | -2.224003 | -1.30472  | 0.000077  |
| C | -3.405966 | -0.595932 | 0.000069  |
| C | 1.429966  | -0.63017  | 0.000504  |
| C | 1.34579   | 0.844475  | 0.000296  |
| C | 2.600738  | 1.590978  | 0.000044  |
| C | 3.742485  | -0.633798 | 0.000638  |
| H | -2.134808 | 2.580197  | 0.000257  |
| H | -2.268604 | -2.385523 | 0.000005  |
| H | 4.624517  | 1.264341  | -0.000454 |
| C | -4.716943 | -1.332875 | -0.000041 |
| H | -5.319375 | -1.073042 | 0.877349  |
| H | -5.319264 | -1.072982 | -0.877489 |
| H | -4.562408 | -2.413204 | -0.000069 |
| C | -4.689935 | 1.631204  | 0.000105  |
| H | -5.306027 | 1.406599  | -0.878431 |
| H | -5.306083 | 1.406593  | 0.878601  |
| H | -4.49033  | 2.705045  | 0.000116  |
| C | 0.228176  | -2.785885 | 0.000089  |
| H | -0.280301 | -3.156271 | 0.890908  |
| H | -0.280268 | -3.156092 | -0.890822 |
| H | 1.256544  | -3.125777 | 0.000072  |
| N | 0.224309  | -1.312947 | 0.000231  |
| N | 0.215723  | 1.498875  | 0.000206  |
| N | 2.606952  | -1.309538 | 0.000558  |
| N | 3.725649  | 0.798791  | -0.000098 |
| O | 4.897115  | -1.156883 | -0.000362 |
| O | 2.70136   | 2.833537  | -0.00047  |

| Water | $\text{H}_2\text{FLH}_{\text{red}}^+\text{-S}_1$ |           |           |
|-------|--------------------------------------------------|-----------|-----------|
| C     | 3.444628                                         | -0.780799 | -0.194324 |
| C     | 2.227254                                         | -1.4664   | -0.138695 |
| C     | 1.035827                                         | -0.78894  | -0.00691  |
| C     | 0.999049                                         | 0.642857  | 0.077048  |
| C     | 2.249195                                         | 1.322462  | 0.077605  |
| C     | 3.441023                                         | 0.649589  | -0.069713 |
| C     | -1.350385                                        | 0.499999  | -0.263314 |
| C     | -1.4257                                          | -0.81213  | 0.208709  |
| C     | -2.635784                                        | -1.481577 | 0.457524  |
| C     | -3.782302                                        | 0.618476  | -0.217433 |
| H     | 2.219331                                         | -2.549894 | -0.181765 |

|   |           |           |           |
|---|-----------|-----------|-----------|
| H | 2.258846  | 2.401693  | 0.133625  |
| C | 4.734535  | 1.410393  | -0.123096 |
| H | 5.414542  | 1.078294  | 0.667361  |
| H | 5.247564  | 1.238522  | -1.074386 |
| H | 4.565384  | 2.481239  | -0.008142 |
| C | 4.723907  | -1.53215  | -0.367467 |
| H | 5.243254  | -1.20814  | -1.277089 |
| H | 5.410819  | -1.33478  | 0.463022  |
| H | 4.548403  | -2.605952 | -0.430918 |
| C | -0.314456 | 2.716593  | 0.385971  |
| H | 0.475329  | 3.029251  | 1.063669  |
| H | -0.260397 | 3.296333  | -0.540489 |
| H | -1.274224 | 2.896021  | 0.866621  |
| N | -0.187098 | 1.284074  | 0.103467  |
| N | -0.183641 | -1.56963  | 0.257171  |
| N | -2.550242 | 1.170616  | -0.467711 |
| N | -3.769014 | -0.649164 | 0.327363  |
| O | -4.830403 | 1.215194  | -0.4677   |
| O | -2.774497 | -2.695387 | 0.728682  |
| H | -2.56357  | 2.057917  | -0.958286 |
| H | -4.674404 | -1.07677  | 0.48581   |
| H | -0.234675 | -2.345847 | -0.42299  |
| H | -0.098924 | -2.02823  | 1.179949  |

| water | <b>H<sub>2</sub>FL<sub>red</sub>-S<sub>1</sub></b> |           |           |
|-------|----------------------------------------------------|-----------|-----------|
| C     | -0.807865                                          | -0.296727 | 0.000005  |
| C     | 0.415414                                           | 0.348913  | 0.000062  |
| C     | 1.628931                                           | -0.357472 | 0.000088  |
| C     | 1.628531                                           | -1.800163 | 0.00006   |
| C     | 0.367723                                           | -2.441396 | -0.00002  |
| C     | -0.82249                                           | -1.731349 | -0.000047 |
| C     | 4.020964                                           | -1.786452 | 0.000182  |
| C     | 4.030522                                           | -0.35962  | 0.000111  |
| C     | 5.219884                                           | 0.383802  | -0.000064 |
| C     | 6.462356                                           | -1.769385 | 0.000154  |
| H     | 0.461374                                           | 1.433558  | 0.000085  |
| H     | 0.318211                                           | -3.521112 | -0.00007  |
| H     | 7.286609                                           | 0.10088   | -0.000196 |
| C     | -2.132289                                          | -2.47237  | -0.00014  |
| H     | -2.736009                                          | -2.217467 | 0.877705  |
| H     | -2.735925                                          | -2.217401 | -0.878025 |
| H     | -1.972518                                          | -3.551951 | -0.000173 |
| C     | -2.090511                                          | 0.490238  | -0.000005 |

|   |           |           |           |
|---|-----------|-----------|-----------|
| H | -2.70526  | 0.263622  | -0.878348 |
| H | -2.705285 | 0.263597  | 0.878315  |
| H | -1.887095 | 1.562879  | 0.000014  |
| C | 2.776283  | -3.95377  | 0.000162  |
| H | 2.257053  | -4.309785 | 0.891578  |
| H | 2.257435  | -4.309851 | -0.891453 |
| H | 3.773024  | -4.377884 | 0.000406  |
| N | 2.820537  | -2.486216 | 0.000136  |
| N | 2.823421  | 0.298318  | 0.000118  |
| N | 5.265487  | -2.423608 | 0.00015   |
| N | 6.402861  | -0.392644 | -0.000065 |
| O | 7.544339  | -2.376128 | -0.00007  |
| O | 5.316268  | 1.641263  | -0.000044 |
| H | 2.841061  | 1.313313  | 0.000069  |
| H | 5.344499  | -3.430993 | 0.000285  |

| water | <b>HFL<sub>red</sub><sup>-</sup>-S<sub>1</sub></b> |           |           |
|-------|----------------------------------------------------|-----------|-----------|
| C     | -0.809647                                          | -0.297041 | 0.000001  |
| C     | 0.416898                                           | 0.353525  | 0.000008  |
| C     | 1.631422                                           | -0.343291 | -0.000005 |
| C     | 1.641846                                           | -1.78963  | 0.000022  |
| C     | 0.379243                                           | -2.436638 | -0.000038 |
| C     | -0.815612                                          | -1.734841 | -0.000052 |
| C     | 4.060587                                           | -1.79006  | -0.000101 |
| C     | 4.031749                                           | -0.347694 | -0.000017 |
| C     | 5.234082                                           | 0.384113  | 0.000036  |
| C     | 6.381888                                           | -1.820071 | -0.000236 |
| H     | 0.455655                                           | 1.439377  | 0.00003   |
| H     | 0.338211                                           | -3.517766 | -0.000076 |
| H     | 7.277148                                           | 0.065777  | 0.000102  |
| C     | -2.123204                                          | -2.483737 | -0.00012  |
| H     | -2.731449                                          | -2.236457 | 0.877527  |
| H     | -2.731394                                          | -2.236393 | -0.877786 |
| H     | -1.956734                                          | -3.562928 | -0.000155 |
| C     | -2.095104                                          | 0.487626  | 0.000032  |
| H     | -2.713992                                          | 0.266469  | -0.878086 |
| H     | -2.713976                                          | 0.26642   | 0.878149  |
| H     | -1.892523                                          | 1.561126  | 0.000061  |
| C     | 2.826701                                           | -3.930361 | 0.000214  |
| H     | 2.312393                                           | -4.300008 | 0.889808  |
| H     | 2.312935                                           | -4.300213 | -0.889612 |
| H     | 3.849891                                           | -4.286669 | 0.000568  |
| N     | 2.842492                                           | -2.464346 | 0.000081  |



|   |          |           |           |
|---|----------|-----------|-----------|
| N | 2.833201 | 0.31354   | 0.000031  |
| N | 5.233393 | -2.48339  | -0.000143 |
| N | 6.381933 | -0.404083 | -0.000027 |
| O | 7.52834  | -2.376129 | 0.000174  |
| O | 5.329614 | 1.647966  | 0.000145  |
| H | 2.851968 | 1.327909  | 0.000074  |

---
